# Supplementary material
Source: publisher site journal article supplement (http://www.spandidos-publications.com/1668/downloadSupplementary)
Supplement: Supplementary file 1 [file downloadSupplementary]

## Sheet: Networks
Table SVIII. Networks.
ID	Molecules in network	Score	Number of DEGs in network	Top diseases and functions
1	ACTR3,DNPEP,DPYSL3,DUS2,DYSF,ECH1,ENY2,EPDR1,EPRS,ERF,FAM136A,FLT1,HNRNPUL1,HPRT1,KARS,LEPROTL1,MAG,MAPK3,MARS,MRPS16,MYRF,NF2,PRPF40A,RBFOX2,RERE,RHO GDI,SCAND1,SDCBP,SERTAD2,TCEAL9,TNKS2,TPR,TSN,XPNPEP3,ZBTB14	52	34	NEUROLOGICAL DISEASE, HEREDITARY DISORDER, ORGANISMAL INJURY AND ABNORMALITIES
2	ACBD3,ATG3,ATG16L1,CCSER2,DIXDC1,DUSP19,FCGRT,FYCO1,GABARAPL2,GBF1,IL3R,JNK,MAP1LC3,MLYCD,NARS,NBR1,NDC1,NUP35,PLPPR2,PPM1L,RAB33B,RETREG3,RFK,SLC12A2,SLC4A2,SMTN,SPC24,SPC25,SYNE1,TEAD,TNN,ULK1,YTHDF1,ZNF768,ZWINT	44	31	CELLULAR ASSEMBLY AND ORGANIZATION, CELL MORPHOLOGY, CELLULAR FUNCTION AND MAINTENANCE
3	ADNP,ARGLU1,C14ORF1,CHERP,CXCL12,DDX24,DHX57,DNA-METHYLTRANSFERASE, DRG1, FAM111A, FOXQ1, FXR1, GON7, HIST1H4A ,HISTONE-LYSINE N-METHYLTRANSFERASE, KAT14,KMT5A,MAPK8IP2,MLLT6,MRPS26,MRTO4,NIFK,NOC4L,NOP56,NSD3,PRR3,RAB11,RAB11FIP5,RRBP1,SF3B1,SMS,SUV39H1,SYNDECAN,TROVE2,UBTF	44	31	DEVELOPMENTAL DISORDER, EMBRYONIC DEVELOPMENT, ORGANISMAL SURVIVAL
4	AKIP1,AKT,ATP1B3,C1GALT1C1,CLASP1,CLIP1,COL4A3BP,COLLAGEN TYPE VI,EMC7, ENOPH1, FNBP4, FSTL1, GPC6, HEPH, IRS, MAPRE3, MARK2,MTCL1,MTSS1,NA-K-ATPASE, NRP2, OGFOD3,PDGF-DD, PLAC1, PLXNA2 ,PXDN, RAB3D,RHOX5,RNF41,RTN4,SCAMP1,SCARA3,TIPARP,TM9SF4,TMEM43	42	30	CELL MORPHOLOGY, NERVOUS SYSTEM DEVELOPMENT AND FUNCTION, TISSUE MORPHOLOGY
5	ACOT9,ANKRD17,ATF5,BAZ1A,C1ORF123,CASC3,CDKN1A,CXADR,H2AFZ,HAT,HAT1,HISTONE,HISTONE DEACETYLASE,HISTONE H4, HJURP, KNSTRN, MPP6, MXD3,NBN,P GLYCOPROTEIN, PBRM1, PTGIS, PTPMT1, RC3H2, RCOR1, RNF6, RPN2,SFXN1,SMARCC2,UBA1,UBE2,UBE2B,UBE2H,UBE2T,UBIQUITIN	38	28	DNA REPLICATION, RECOMBINATION, AND REPAIR, CELL DEATH AND SURVIVAL, CONNECTIVE TISSUE DEVELOPMENT AND FUNCTION
6	AHI1,BCL2L11,BETACATENIN/TCF,CADHERIN,CALCINEURIN PROTEIN(S), CCND1, CDH15, COPS7A, CPSF7, DAB2, ELK1, ENDOD1, GAK, GRIPAP1, HDAC,HDAC1L,HSP,ID2,ID3,IFRD1,KLF6,NDRG4,NFAT5,NFAT (COMPLEX), PHGDH, PYCR1, SERPINF1,SPP1,SV2B,TCF/LEF,TCF7L1,TNRC18,TSHZ3,WISP2,ZEB1	38	28	CELLULAR DEVELOPMENT, HAIR AND SKIN DEVELOPMENT AND FUNCTION, REPRODUCTIVE SYSTEM DEVELOPMENT AND FUNCTION
7	AGO1,AJUBA,CGGBP1,CHTF8,CMTM7,DCAF8,DDX6,EIF3,EIF3C,EIF3E,EIF3J,EIF4A,EIF4EBP,EIF4EBP1,EIF4EBP2,EIF4G,EIF4G1,EIF4H,EPH RECEPTOR,GGH,INPPL1,LRRK1,MAPK,MIRLET7,MVD,NUBP2,P70 S6K, PDCD4, POLDIP3, RIN2, SPATS2L,SPIN1,SPRY4,TNS2,WISP1	35	27	GENE EXPRESSION, PROTEIN SYNTHESIS, LIPID METABOLISM
8	ACSS2,CIAP,CPT1,CYP39A1,DHCR7,ELOVL6,FADS1,FASN,FDPS,FOXO4,GSE1,HMG COA SYNTHASE,HMGCR,IDI1,INSIG1,INSIG2,LDLR,MBTPS1,MIR122A,B,MRPL18,MVK,PDLIM5,PMVK,RAL,RALA,RALBP1,RAS,RORA,SCD,SCD2,SMCHD1,SREBP,STEAP2,STEAROYL-COA 9-DESATURASE,UCP2	35	27	LIPID METABOLISM, SMALL MOLECULE BIOCHEMISTRY, VITAMIN AND MINERAL METABOLISM
9	20S PROTEASOME,ALCOHOL GROUP ACCEPTOR PHOSPHOTRANSFERASE,AMFR,AOX1,CASEIN,CCNL2,CSTF3,CTBP,CTDNEP1,DYRK1A,E3 RING, EIF2, EOTAXIN, ERRFI1, FAM53C, GRK6, HIPK2, IFITM3,LOXL4,NUFIP2,PIAS,PSMB4,PSMF1,RAD23A,RAD23B,RBBP6,SGK1,SLC6A8,SSR1,STAT3,TPI1 (INCLUDES OTHERS), TRIM25, TTK, TXNL1, UBQLN2	35	27	AMINO ACID METABOLISM, POST-TRANSLATIONAL MODIFICATION, SMALL MOLECULE BIOCHEMISTRY
10	AP1,ATP6V0C,CD44,CG,CLU,CNPY4,COLLAGEN(S),CREB,DDX28,ETS2,FAM167A,FDX1,FOXN3,FSH,HMGN2 (INCLUDES OTHERS),IL12 (FAMILY), INHBA, INTERLEUKIN,ITGB1,LGALS3,LH,MHC CLASS II (COMPLEX), PHTF1, PLA1A, PSAT1, SERPINE1,SMARCA4,SOX9,ST6GALNAC4,STARD10,STEAP1,STK38L,TGF BETA,TGFB2,TLN2	31	25	CELLULAR FUNCTION AND MAINTENANCE, CANCER, GASTROINTESTINAL DISEASE
11	AGPAT5,AKAP2,ANXA4,ARHGAP11A,ART3,BCR (COMPLEX),BSG,CFL1,CHMP2B,DBN1,DCLK1,DNAAF5,ECE1,EEA1,EGLN,ERMP1,FKBP8,FLNA,FOCAL ADHESION KINASE,GNG12,IKB,IL-1R,NFKB (FAMILY),NSG1,PALMD,PAM,PDK3,PLA2,PPP2C,RAB5C,RSK,SAPK,SLC25A30,SOS,YES1	29	24	CELLULAR ASSEMBLY AND ORGANIZATION, CELLULAR FUNCTION AND MAINTENANCE, CARDIOVASCULAR DISEASE
12	2-OXOGLUTARATE:OXYGEN OXIDOREDUCTASE, 26S PROTEASOME, ALKBH5, ALPK1, AMPK, ASAH1,BTG1,CBX6,CSDE1,CXCL2,DUB,DUSP1,GALNT1,GNRH,GTF2I,IGG,IGG2B,IL17RE,IMMUNOGLOBULIN,KDM5B,MRPS35,NOS,PARP,PHF8,PRKAA,SMARCA2,SPRYD7,STAT1,TET3,TRA2A,TRAF6,TSC22D3,UCHL3,USP7,USP40	29	24	LYMPHOID TISSUE STRUCTURE AND DEVELOPMENT, ORGAN MORPHOLOGY, TISSUE MORPHOLOGY
13	ABCC1,ANKRD52,ATP1B1,ATPASE,CCT6A,CD3,CK2,DNAJB12,DYNLT1,EIF2S1,HISTONE H3,HMGXB4,HSP70,HSPA4,HSPA1A/HSPA1B,IKK (COMPLEX),ILVBL,KDM5A,MAP7D1,NSRP1,NUDT4,P85 (PIK3R),PDCL3,PDGFR,PHOSPHATASE,PKA CATALYTIC SUBUNIT, PLEKHA5, PPP4C, PPP6C, PRKCA, SRPK2,STAT,TCP1,TNS3,VCAM1	29	24	CELL-TO-CELL SIGNALING AND INTERACTION, CARBOHYDRATE METABOLISM, DRUG METABOLISM
14	ADAM19,AMYLASE,ASNS,CBP/P300,CHST2,GRAMD2B,HYPK,IGE,INSULIN,INTERFERON ALPHA,KANK2,LSM6,MED13L,MEDIATOR,MFAP1,NUCB2,PROINSULIN,PTPRV,RDM1,RNA POLYMERASE II,RPA,SERPINB1,SMC1A,SNRNP,SNRNP48,SNRPA1,SNRPD3,SOCS3,SORT1,SOX4,STAT5A/B,TBC1D10A,TCERG1,TH2 CYTOKINE,TXLNA	28	23	ENDOCRINE SYSTEM DEVELOPMENT AND FUNCTION, RNA POST-TRANSCRIPTIONAL MODIFICATION, CELL CYCLE
15	ALPHA ACTIN, ANK1, AURK, BNIP2, CDC42EP1, CNN2,DAAM1,DAP,FASCIN,FNDC3B,G-ACTIN, GOLGA4,JUN/JUNB/JUND,LUC7L3,LYMPHOTOXIN,MFHAS1,MYOSIN,MYOSIN-LIGHT-CHAIN KINASE,NCOR-LXR-OXYSTEROL-RXR-9 CIS RA,NEB,NFKB (COMPLEX),PCLAF,RAB31,SELENOS,SEPT7,SEPT8,SMOOTH MUSCLE ACTIN, SOD3, SPTBN1, TPM3, TRAPPC9,TROPOMYOSIN,TROPONIN T,TTN,ZFAND6	26	22	DEVELOPMENTAL DISORDER, HEREDITARY DISORDER, ORGANISMAL INJURY AND ABNORMALITIES
16	AHR-ARYL HYDROCARBON-ARNT, AHRR, ALPHA 1 ANTITRYPSIN, CACNB2, CHYMOTRYPSIN, CREB5,FSCN1,GLUTATHIONE TRANSFERASE, GP2B3A RECEPTOR, GST, GSTA4, GSTM3, GTF3C1, GYPC, HSD17B7 ,INTEGRIN ALPHA V BETA 3,K CHANNEL, NEUROTROPHIN, NFIB, NFIC,NUCLEAR FACTOR 1, PCCA, PKC(S), PSCA, PSMC3IP, SERPINA3, SERPINA4,SHC2,SLC4A1,SUB1,TCF,TFIIH,TRYPSIN,WRB,ZNF106	24	21	DRUG METABOLISM, HEMATOLOGICAL DISEASE, METABOLIC DISEASE
17	BASP1,C6ORF89,CACHD1,CMIP,CUL3,FAM8A1,FBXO6,FETUB,HSPB11,IFT27,ISY1-RAB43, KIAA0040, KRTAP10-3, MBTPS2, MRPL21, MTORC1, NRM, NSG1，OTUB1, PRPF31, RAB12, RC3H2, SLC7A5, SMOC1, SRRM1, SYT13, SYVN1,TIMM50,TMEM106B,TNF,TOMM5,UBC,WDR6,XAB2,ZNF830	24	21	CELL CYCLE, DEVELOPMENTAL DISORDER, EMBRYONIC DEVELOPMENT
18	ACAD8,AKR1C3,ANKHD1/ANKHD1-EIF4EBP3,C8ORF44-SGK3/SGK3, COL6A3, CYP7A1,EBNA1BP2,FDFT1,FOXO,GK,IGF,IGFBP,MED6,MMP11,MTHFD2,MXI1,N-COR, NR1H, PDK4, PEPCK,PI3K (COMPLEX), RAR, RASA3, RCAN1, RXR, SLC44A1,SWI-SNF,T3-TR-RXR, TBL1X, TGFB1I1, THYMIDINE KINASE,THYROID HORMONE RECEPTOR, VITAMIND3-VDR-RXR,VLA-4,ZNF346	22	20	CANCER, ORGANISMAL INJURY AND ABNORMALITIES, REPRODUCTIVE SYSTEM DISEASE
19	ARF,ARF3,CALCINEURIN A, CMIP, ELASTASE, ELF2, EPHB, EPHB4, ETS, FKBP2, FKBP1A ,HMMR,NCK,NR2F2,OAF,PABPN1,PAIP2,PAPOLA,PDE4,PEPTIDYLPROLYL ISOMERASE, PMCA, PMEPA1, PPIC, PURB, RNF111, SMAD, SMAD6, SMAD1/5/8,SMAD2/3,SMAD2/3-SMAD4, TCF23, TGFBR,TM2D3,VEGF,WASL	22	20	CARDIOVASCULAR DISEASE, CARDIOVASCULAR SYSTEM DEVELOPMENT AND FUNCTION, ORGAN MORPHOLOGY
20	7S NGF,ADAPTOR PROTEIN 1,ALDH1L2,ALPHA TUBULIN,AP1 GAMMA,AP1B1,AP1M1,AP1S1,AP2 ALPHA,APC/APC2,BETA TUBULIN,COLLAGEN ALPHA1, COLLAGEN TYPE II,COLLAGEN TYPE III, DDR2, DENND1B, DYNEIN,ENDOTHELIN RECEPTOR, GGA2, GGA3, MAP6, MYCBP2,MYLPF,N-CADHERIN,NES,P38 MAPK, SLAIN2,SS18L2,TMSB4,TNNC2,TTLL7,TUBA8,TUBB6,TUBULIN (FAMILY),ZNFX1	21	19	CELL MORPHOLOGY, CELLULAR ASSEMBLY AND ORGANIZATION, CANCER
21	AKAP12,ANAPC13,APC (COMPLEX), CCNB1, CDC2, CDK,CDK4/6,CUX1,CYCLIN A,CYCLIN B,CYCLIN D, CYCLIN E, CYP51A1, DYNC1LI1, E2F,GLI,GLYCOGEN SYNTHASE, HELB, HIST1H1E,HISTONE H1, HSPG, IMPORTIN BETA, LSS,MSMO1, NSDHL, PJA2, PKA, PRKAR1B,RB,SC5D,SLC1A3,SNAPC2,SNAPC3,TM7SF2,TMEM126B	21	19	GENE EXPRESSION, DEVELOPMENTAL DISORDER, HEREDITARY DISORDER
22	ADAM10,ALP,ATP2A2,CACNA2D1,CD14,CD81,CIRBP,COLLAGEN TYPE I,COX4I1,CYTOCHROME-C OXIDASE, FGF,HIGD1A,IFN GAMMA, IGA, IGG1, IGG3, IL1, IL33, MITOCHONDRIAL COMPLEX 1, MLC, NDUFB2, NDUFS8, NOTCH, NOTCH2, PEX19,PRO-INFLAMMATORY CYTOKINE, RAS HOMOLOG, S100A4, SCN1B, SDC1, SECRETASE GAMMA,TGFBI,TMX2,TNF (FAMILY),UNC5B	21	19	CELLULAR MOVEMENT, AUDITORY DISEASE, NEUROLOGICAL DISEASE
23	ADI1,AKR1C19,ANGPTL7,APP,ARMCX3,BUD31,C11ORF54,C1R,C1S,CARS,CAVIN4,CHURC1,DTD2,FITM1,GEMIN8,KDELR3,KERATAN SULFATE,KIAA1143,KLK9,MRPS6,MVB12A,NCDN,PARP3,PLASMINOGEN ACTIVATOR, PMEPA1, SBNO2, SLC25A38, STARD10, TCN2, TGFB1, TLL1,TMEM183A,UXT,VPS37A,ZSCAN16	21	19	CONNECTIVE TISSUE DISORDERS, DERMATOLOGICAL DISEASES AND CONDITIONS, DEVELOPMENTAL DISORDER
24	ABCB9,ANKZF1,C19ORF44,COPS5,CTDNEP1,DCAF8,DNAL1,ECE2,FAM53C,FBXW9,FEM1C,FKBP10,GSTCD,HNF4A,MID1IP1,MPLKIP,MYCN,NCAPH2,NUCB1,OSER1,PALMD,PRELID2,RBM42,RPL41,SCYL3,SEC11C,SFSWAP,SLC38A4,TM6SF1,TMEM115,TTC25,UNC80,WASHC5,WDR89,XPO1	21	19	DEVELOPMENTAL DISORDER, TISSUE MORPHOLOGY, CONNECTIVE TISSUE DISORDERS
25	AGRN,CAVEOLIN,CHRNB1,COL4A1,COL4A2,COLLAGEN TYPE IV,CSRP2,DAG1,DBNDD1,FC RECEPTOR, FCER1, FIBRINOGEN,GM-CSF, GROWTH FACTOR RECEPTOR,IL-2R, JAG1, KRT7, LAMC2, LAMININ, LAMININ1, LAMININ2, LDL-CHOLESTEROL, MMP14, NEFH, NEXN, NID1,PDGF (COMPLEX),PDGF AB,PDGF BB,PI3K P85, PKG, PRRX2, SHC1, TIMP3, YAP1	19	18	HEREDITARY DISORDER, ORGANISMAL INJURY AND ABNORMALITIES, SKELETAL AND MUSCULAR DISORDERS
Score: -log(P-Values),
